# Supplementary material for: Structure of the Capsid Size-Determining Scaffold of “Satellite” Bacteriophage P4
Source: MDPI journal article supplement (doi:10.3390/v12090953), 2020-08-27
Supplement: s1 [file s1]

SUPPLEMENTARY INFORMATION

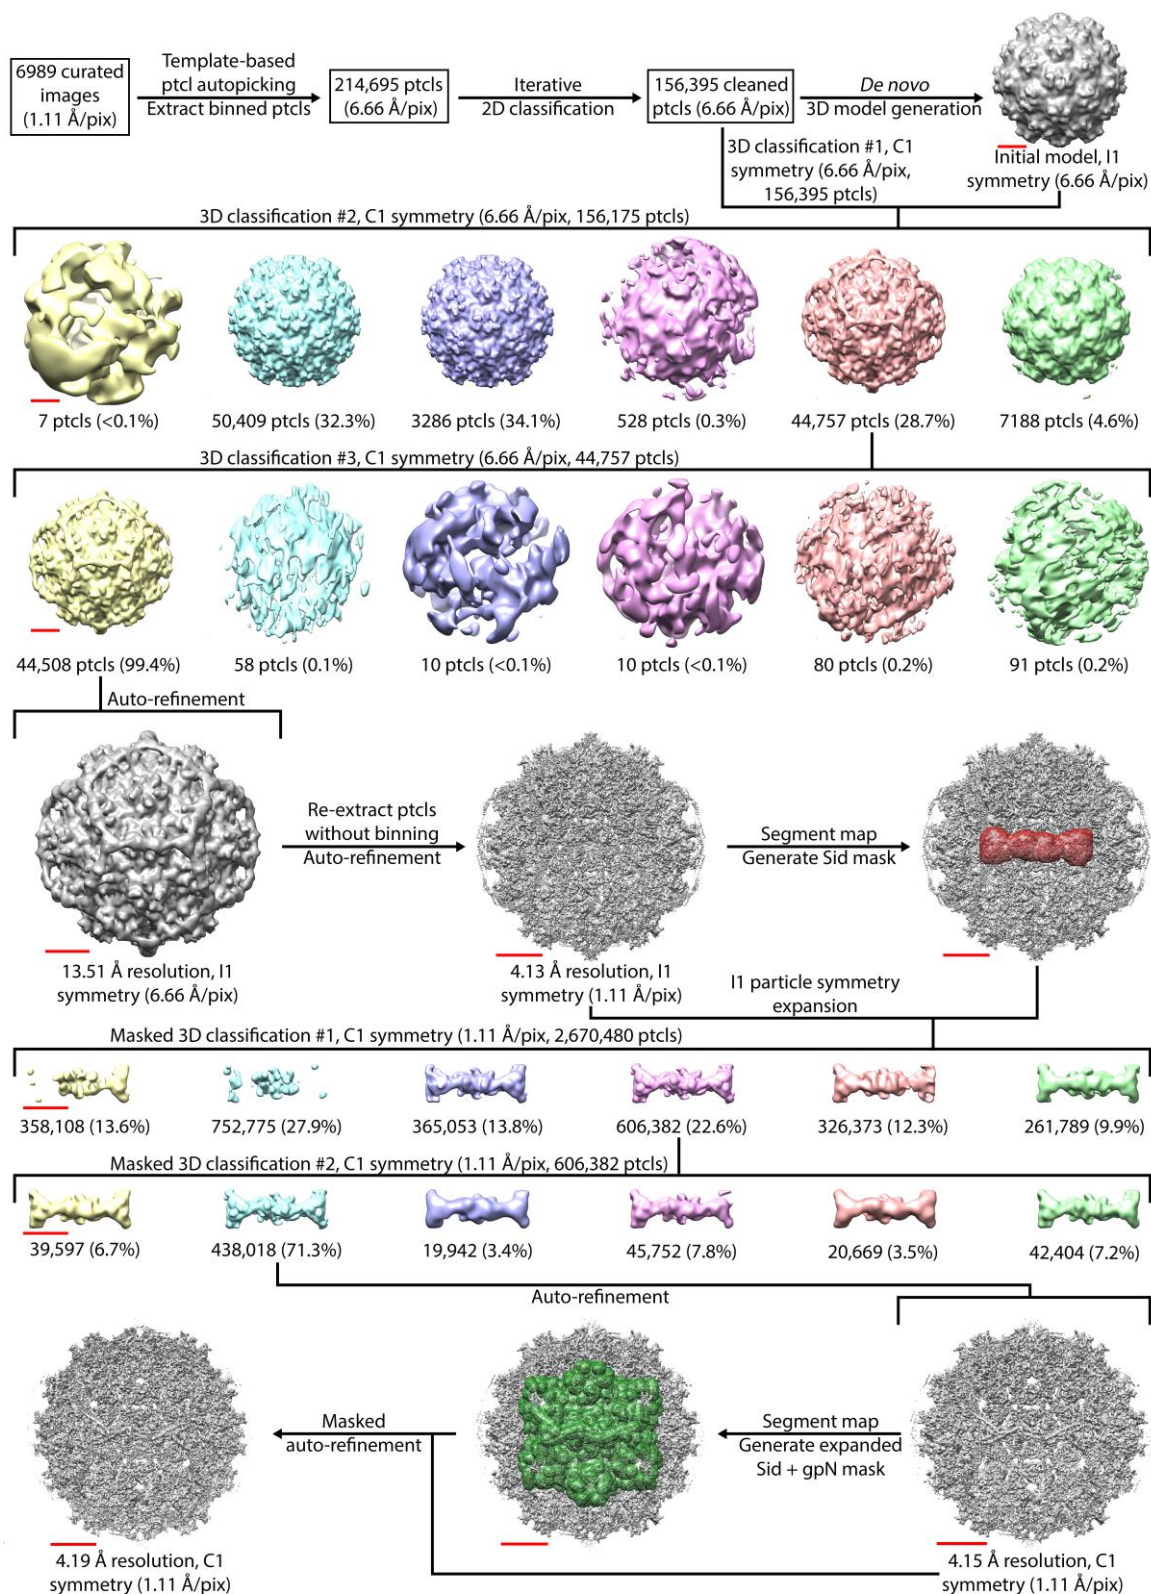

Figure S1. Reconstruction scheme.

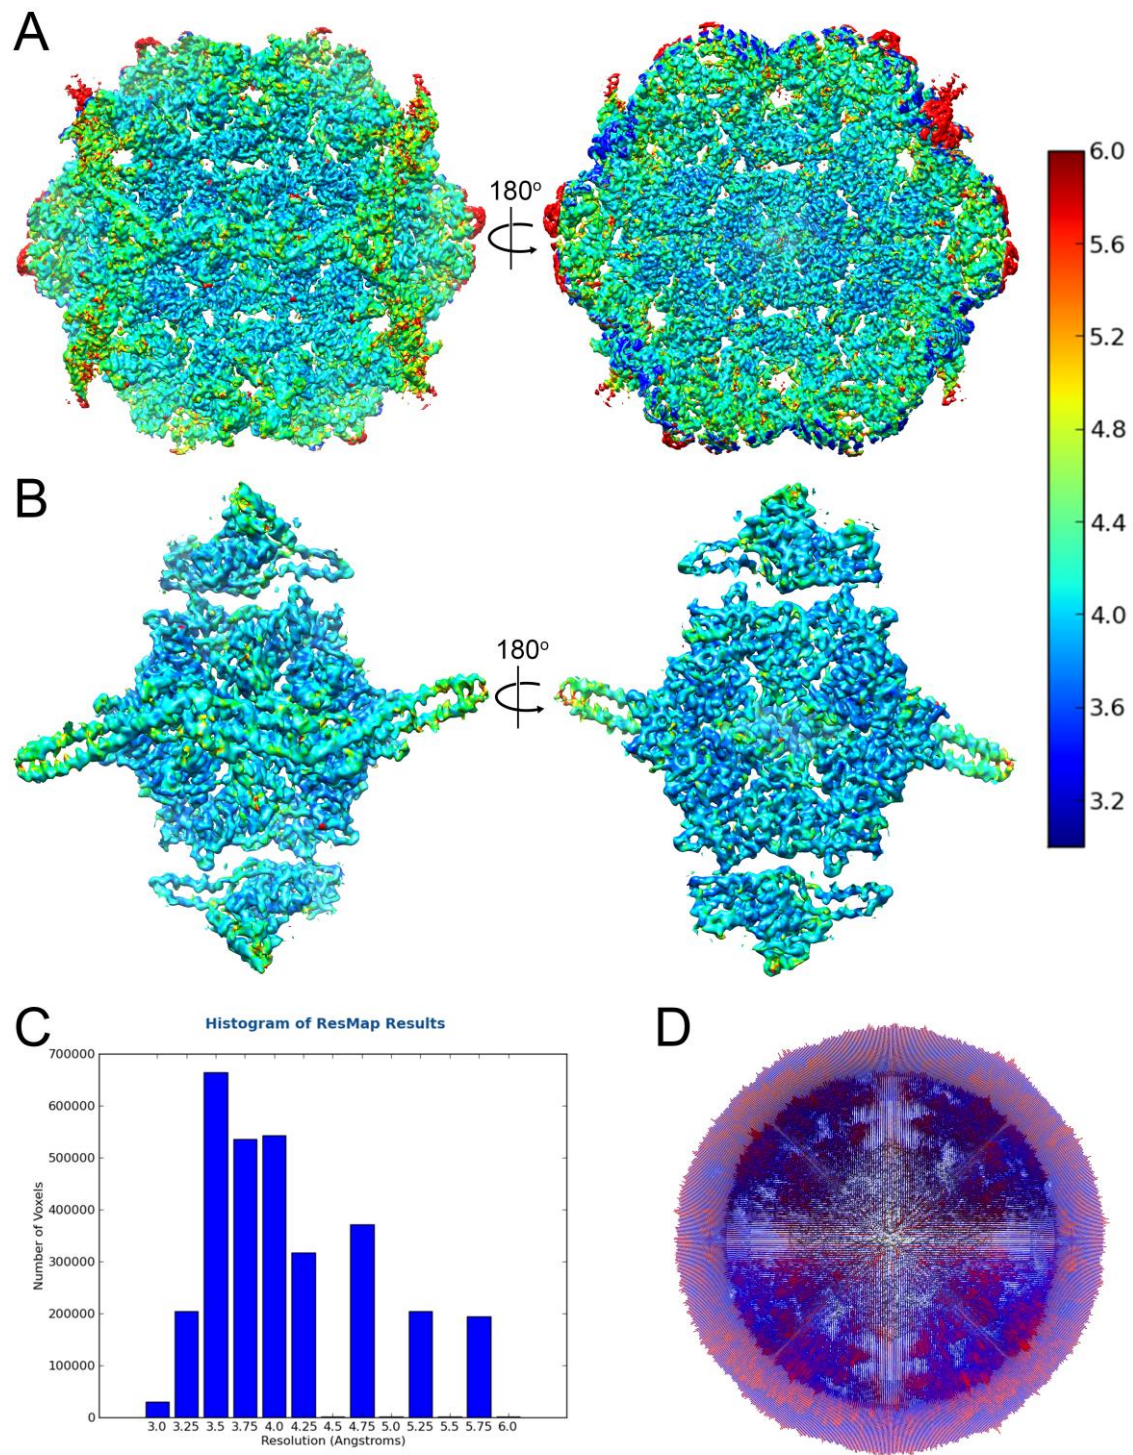

**Figure S2.** Local resolution. (A) ResMap representation of the local resolution of the P4 procapsid reconstruction, colored from blue ( $\leq 3\text{\AA}$  resolution) to red ( $\geq 6\text{\AA}$  resolution), showing the portion of the capsid used for refinement. (B) Close-up showing the local resolution in two asymmetric units. (C) Histogram of distribution of local resolution by voxel. (D) Hedgehog representation of the Euler angle distribution.



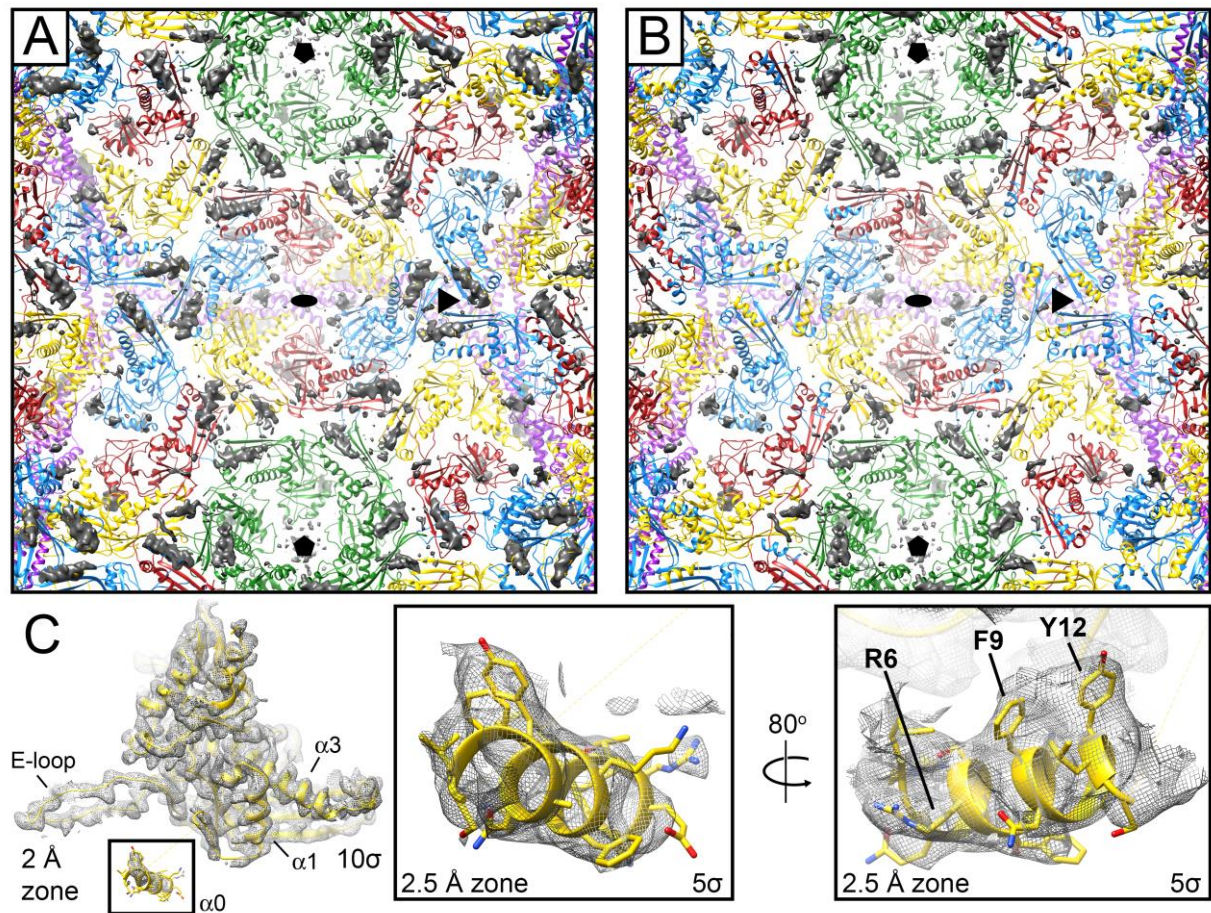

**Figure S3.** Difference maps. (A) View from inside the capsid of a difference map calculated by subtracting the contribution of the modeled residues 27–346 of gpN and 7–241 of Sid, showing the presence of additional density surrounding the threefold axes. GpN and Sid are shown as ribbon diagrams, colored as in Figure 2. (B) After modeling gpN residues 1–14 into the densities surrounding the icosahedral threefold axes, only the poorly defined densities around the quasi-threefold axes surrounding the pentamers remain. (C) Density (at 10σ cutoff) and atomic model for the gpN<sub>B</sub> subunit, showing the additional density due to the α0 helix. Insets: closeup views of the α0 helix density (at 5σ cutoff), showing the densities ascribed to side chains Arg6, Phe9 and Tyr12.

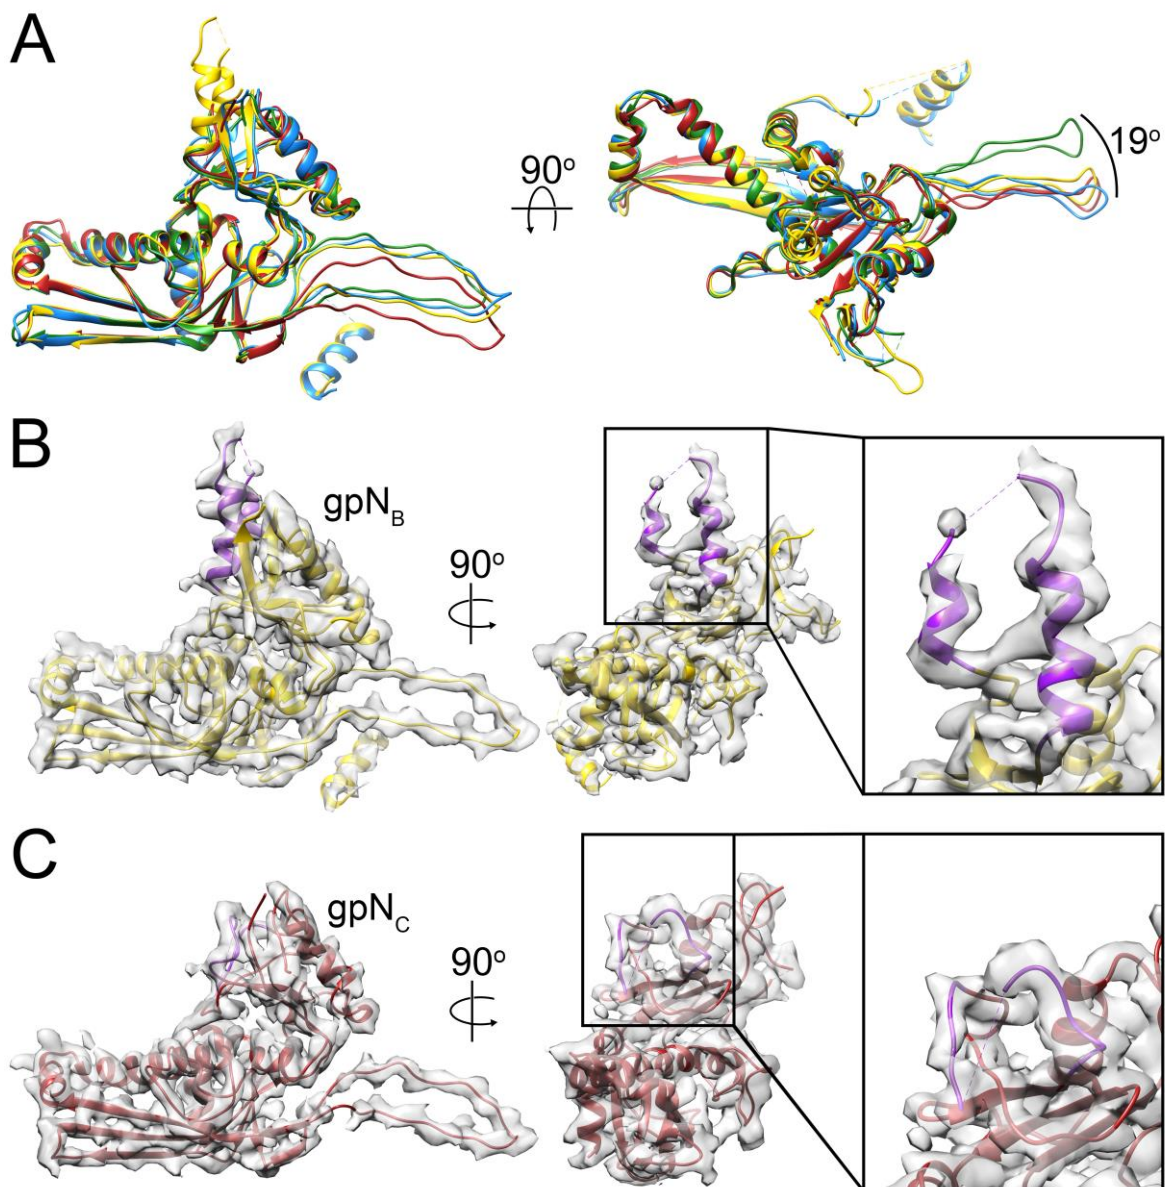

**Figure S4.** Differences between gpN subunits. (A) Superposition of gpN subunits A–D, colored as in Figure 2. The 19° rotation of the gpNA E-loop compared to gpNB–gpND is shown most clearly in the 90° rotated panel on the right. (B,C) Density and atomic model for gpNB (B, yellow), and for gpNC (C, red). The insets on the right show the difference in the loop (purple) that includes the  $\alpha 6$ - $\alpha 6'$  helices that are only ordered in gpNB, the subunit that interacts with Sid.

**Table S1.** Reconstruction and refinement statistics.

| <b>Data Collection</b>                          |                                                             |
|-------------------------------------------------|-------------------------------------------------------------|
| Microscope                                      | Titan Krios                                                 |
| Detector                                        | Gatan K3                                                    |
| Pixel size (Å)                                  | 1.11                                                        |
| Magnification                                   | 45000                                                       |
| Electron dose (e <sup>-</sup> /Å <sup>2</sup> ) | 30                                                          |
| Frames per movie                                | 40                                                          |
| Typical defocus range (µm)                      | 0.5-2.5                                                     |
| <b>Reconstruction</b>                           |                                                             |
| Number of particles                             | 438,018                                                     |
| Software                                        | RELION-3.1                                                  |
| Symmetry                                        | C1                                                          |
| Final resolution (FSC=0.143, Å)                 | 4.19 (RELION); 3.90 (Phenix)                                |
| <b>Atomic Model Refinement</b>                  |                                                             |
| Software                                        | phenix.real_space_refine<br>(Phenix v1.18.2); Coot v0.8.9.2 |
| Resolution limit (Å)                            | 4.19                                                        |
| Model-map correlation (FSC=0.5, Å)              | 4.17                                                        |
| Chains                                          | 10                                                          |
| Residues                                        | 2858                                                        |
| Number of atoms                                 | 22758                                                       |
| Protein atoms                                   | 22758                                                       |
| Hydrogens                                       | 0                                                           |
| Map CC <sub>box</sub>                           | 0.5                                                         |
| Map CC <sub>mask</sub>                          | 0.86                                                        |
| RMSD bond length (Å)                            | 0.004                                                       |
| RMSD bond angles (°)                            | 0.593                                                       |
| <b>Validation</b>                               |                                                             |
| Ramachandran plot (%)                           |                                                             |
| Favored                                         | 91.54                                                       |
| Allowed                                         | 8.46                                                        |
| Outliers                                        | 0                                                           |
| Rotamer outliers (%)                            | 0.16                                                        |
| Clashscore                                      | 7.79                                                        |
| EMRinger score                                  | 1.48                                                        |

**Table S2.** Root-mean-square deviations (RMSD) in gpN. RMSD values (in Å) calculated between equivalent C $\alpha$  atoms in the four quasi-equivalent gpN subunits A–D. The first set of values include only those C $\alpha$  atoms that are within 2 Å, the second set include all C $\alpha$  atoms.

| RMSD [Å] (included C $\alpha$ pairs) |                        |                        |                        |                        |
|--------------------------------------|------------------------|------------------------|------------------------|------------------------|
| C $\alpha$ pairs within 2 Å          |                        |                        |                        |                        |
|                                      | <i>gpN<sub>A</sub></i> | <i>gpN<sub>B</sub></i> | <i>gpN<sub>C</sub></i> | <i>gpN<sub>D</sub></i> |
| <i>gpN<sub>A</sub></i>               | 0                      |                        |                        |                        |
| <i>gpN<sub>B</sub></i>               | 0.732 (237)            | 0                      |                        |                        |
| <i>gpN<sub>C</sub></i>               | 0.836 (238)            | 0.837 (230)            | 0                      |                        |
| <i>gpN<sub>D</sub></i>               | 0.782 (235)            | 0.854 (289)            | 0.809 (239)            | 0                      |
| All C $\alpha$ pairs                 |                        |                        |                        |                        |
|                                      | <i>gpN<sub>A</sub></i> | <i>gpN<sub>B</sub></i> | <i>gpN<sub>C</sub></i> | <i>gpN<sub>D</sub></i> |
| <i>gpN<sub>A</sub></i>               | 0                      |                        |                        |                        |
| <i>gpN<sub>B</sub></i>               | 2.328 (279)            | 0                      |                        |                        |
| <i>gpN<sub>C</sub></i>               | 3.261 (274)            | 2.425 (281)            | 0                      |                        |
| <i>gpN<sub>D</sub></i>               | 2.913 (276)            | 2.379 (307)            | 2.166 (279)            | 0                      |
